# Supplementary material
Source: PubMed Central journal article supplement (PMC7825985)
Supplement: mmc1.pdf [file mmc1.pdf]

**Appendix A.** Cronbach's alphas for dimensions parental feeding practices (before and during lockdown) and final item loadings in confirmatory factor analyses (CFA) (before and during lockdown).

| Dimension parental feeding practice with items                                                                                                                                                                                                                                               | Loading<br>“before<br>lockdown”                            | Loading<br>“during<br>lockdown” |
|----------------------------------------------------------------------------------------------------------------------------------------------------------------------------------------------------------------------------------------------------------------------------------------------|------------------------------------------------------------|---------------------------------|
| <b>Soothing with food (<math>\alpha_{\text{bef}} = 0.81</math> (acceptable); <math>\alpha_{\text{dur}} = 0.77</math> (acceptable))</b>                                                                                                                                                       |                                                            |                                 |
| Sooth1. Quand mon enfant s'ennuie ou s'inquiète, je lui propose de manger ou boire quelque chose même si je sais qu'il/elle n'a pas faim. ( <i>I give my child something to eat or drink when she or he is bored or worried, even if I know she or he is not hungry.</i> )                   | <b>No CFAs needed because acceptable Cronbach's alphas</b> |                                 |
| Sooth2. Quand mon enfant est énervé/excité je lui propose de manger quelque chose. ( <i>When my child is annoyed or excited, I offer his something to eat; replacing the original item: Offering my child something to eat is one of the best ways to stop his or her temper tantrums.</i> ) |                                                            |                                 |
| Sooth3. Je propose des aliments pour distraire mon enfant (par exemple, s'il/elle m'empêche de faire mon (télé)travail). ( <i>How often do you use food as a way to distract your child (eg, if he or she is preventing you from doing your chores)?</i> )                                   |                                                            |                                 |
| Sooth4. Pour que mon enfant se conduise bien, je lui promets quelque chose à manger. ( <i>To get my child to behave himself or herself I promise him or her something to eat.</i> )                                                                                                          |                                                            |                                 |
| <b>Rules and limits around unhealthy foods<sup>a</sup> (<math>\alpha_{\text{bef}} = 0.64</math> (acceptable); <math>\alpha_{\text{dur}} = 0.63</math> (acceptable))</b>                                                                                                                      |                                                            |                                 |
| Rules1. Je limite les collations sucrées ou salées (bonbons, glaces, gâteaux, biscuits, chips) de mon enfant. ( <i>I place limits on the sweet or salty snacks (candy, ice cream, cake, potato chips, tortilla chips) that my child eats.</i> )                                              | <b>No CFAs needed because acceptable Cronbach's alphas</b> |                                 |
| Rules2. Je restreins (ou essaie de restreindre) l'accès de mon enfant aux sodas. ( <i>How often do you restrict (or try to restrict) your child's access to sweetened beverages?</i> )                                                                                                       |                                                            |                                 |
| Rules3. Si mon enfant demande des sodas, je lui en donne (R). ( <i>If my child asks for sweetened beverages (including juice drinks or soda), I will give it to him or her. (R)</i> )                                                                                                        |                                                            |                                 |
| Rules4. Je permets à mon enfant de se servir des collations salées ou sucrées ou des bonbons quand il/elle est à la maison. (R) ( <i>How often do you allow your child to help himself or herself to snacks, including salty or sweet snacks, or candy when he or she is at home? (R)</i> )  |                                                            |                                 |
| <b>Guided choices - when food is eaten (<math>\alpha_{\text{bef}} = 0.55</math> (borderline); <math>\alpha_{\text{dur}} = 0.57</math> (borderline))</b>                                                                                                                                      |                                                            |                                 |
| When1. J'autorise mon enfant à manger entre les repas quand il/elle le veut. ( <i>I let my child eat between meals whenever she or he wants.</i> )                                                                                                                                           | <b>0.48</b>                                                | <b>0.46</b>                     |
| When2. Je laisse mon enfant décider quand il souhaite prendre son repas. ( <i>I let my child decide when he or she would like to have his or her meal.</i> )                                                                                                                                 | <b>0.99</b>                                                | <b>0.99</b>                     |
| When3. Je décide les moments où mon enfant prend ses repas. (R) ( <i>I decide the times when my child eats his or her meals. (R)</i> )                                                                                                                                                       | <b>0.62</b>                                                | <b>0.64</b>                     |
| <b>Guided choices - what food is eaten (<math>\alpha_{\text{bef}} = 0.39</math> (low); <math>\alpha_{\text{dur}} = 0.41</math> (low))</b>                                                                                                                                                    |                                                            |                                 |
| What1. J'autorise mon enfant à choisir ce qu'il/elle veut pour les collations entre les repas. ( <i>I allow my child to choose what she or he has for snacks.</i> )                                                                                                                          | <b>0.33</b>                                                | <b>0.38</b>                     |
| What2. Je décide de ce que mon enfant mange entre les repas. (R) ( <i>I decide what my child eats between meals. (R)</i> )                                                                                                                                                                   | <b>0.79</b>                                                | <b>0.74</b>                     |

|                                                                                                                                                                                                                                                                                                                                              |                         |                                                            |
|----------------------------------------------------------------------------------------------------------------------------------------------------------------------------------------------------------------------------------------------------------------------------------------------------------------------------------------------|-------------------------|------------------------------------------------------------|
| What3. En tant que parent, je décide des catégories d'aliments que mon enfant mange. (R) ( <i>As a parent, I decide the kinds of food that my child eats. (R)</i> )                                                                                                                                                                          | <b>0.47</b>             | <b>0.47</b>                                                |
| <b>Guided choices - amount of food eaten<sup>b</sup> (<math>\alpha_{\text{bef}} = 0.33</math> (low); <math>\alpha_{\text{dur}} = 0.31</math> (low)) (0.28 and 0.24 if amount3 not deleted)</b>                                                                                                                                               |                         |                                                            |
| Amount1. Pendant les repas, je laisse mon enfant décider quand il/elle a assez mangé. ( <i>During meals, I allow my child to decide when she or he has had enough to eat.</i> )                                                                                                                                                              | <b>0.29</b>             | <b>0.32</b>                                                |
| Amount2. Quand il/elle prend des collations entre les repas, je laisse mon enfant décider quand il/elle a assez mangé. ( <i>At snack time, I allow my child to decide when she or he has had enough to eat.</i> )                                                                                                                            | <b>0.81</b>             | <b>0.69</b>                                                |
| Amount3. Lorsque mon enfant dit "je n'ai pas faim", je réponds "tu dois manger quand même" (R) ( <i>When your child says "I'm not hungry," how often do you reply "You need to eat anyway"?</i> (R))                                                                                                                                         | <b>removed</b>          | <b>removed</b>                                             |
| <b>Meal setting (<math>\alpha_{\text{bef}} = 0.39</math> (low); <math>\alpha_{\text{dur}} = 0.36</math> (low))</b>                                                                                                                                                                                                                           |                         |                                                            |
| Sett1. A quelle fréquence votre enfant mange-t-il/elle dans sa chambre ? (R) ( <i>How often does your child eat in a bedroom?</i> (R))                                                                                                                                                                                                       | <b>0.81</b>             | <b>0.78</b>                                                |
| Sett2. Je limite le grignotage/le goûter à des endroits ou des lieux bien définis dans notre maison. ( <i>Do you limit snacking to designated places in your home?</i> )                                                                                                                                                                     | <b>0.73</b>             | <b>0.72</b>                                                |
| Sett3. J'insiste pour que mon enfant prenne ses repas à table. ( <i>I insist my child eats meals at the table.</i> )                                                                                                                                                                                                                         | <b>0.48</b>             | <b>0.44</b>                                                |
| <b>Atmosphere of meals (<math>\alpha_{\text{bef}} = 0.69</math> (acceptable); <math>\alpha_{\text{dur}} = 0.71</math> (acceptable))</b>                                                                                                                                                                                                      |                         |                                                            |
| Atmos1. Le repas du soir est un moment convivial en famille. ( <i>Dinner time is usually a pleasant time for the family.</i> )                                                                                                                                                                                                               |                         | <b>No CFAs needed because acceptable Cronbach's alphas</b> |
| Atmos2. Le repas du soir est un moment tendu ou stressant pour notre famille. (R) ( <i>How frequently is the evening meal an unpleasant or stressful time for your family?</i> (R))                                                                                                                                                          |                         |                                                            |
| Atmos3. Le repas du soir est un moment de conflit pour notre famille. (R) ( <i>Dinner time is a time of conflict for the family</i> (R) ;replacing the original items: <i>How often would you say arguments about eating occur during dinner time?</i> ; <i>-How often do other arguments, not about eating, occur during dinner time?</i> ) |                         |                                                            |
| <b>Feeding on a schedule (<math>\alpha_{\text{bef}} = 0.52</math> (borderline); <math>\alpha_{\text{dur}} = 0.56</math> (borderline))</b>                                                                                                                                                                                                    |                         |                                                            |
| FS1. En semaine, je fais en sorte que mon enfant mange à des heures régulières. ( <i>During the week, do you make him/her eat at set times?</i> )                                                                                                                                                                                            | <b>0.70<sup>c</sup></b> | <b>0.82<sup>c</sup></b>                                    |
| FS2. Le week-end, je fais en sorte que mon enfant mange à des heures régulières. ( <i>During the weekend, do you make him/her eat at set times?</i> )                                                                                                                                                                                        | <b>0.70<sup>c</sup></b> | <b>0.82<sup>c</sup></b>                                    |
| FS3. Quand mon enfant a faim avant le repas, je le fais patienter ( <i>When my child is hungry before a meal time, I make him/her wait.</i> )                                                                                                                                                                                                | <b>0.70<sup>c</sup></b> | <b>0.82<sup>c</sup></b>                                    |

Answer options ranged from "never" to "always" for all items in the French questionnaire.

Items in italics are the original English items, unless described otherwise. ; (R) = reversed item

Cronbach's alphas were acceptable if >0.60, borderline if between 0.50-0.60, and low if <0.50

All the items have a p-value  $\leq 0.001$  except the item Amount2<sub>bef</sub>, the p-value of which is 0.021.

<sup>a</sup> For the dimension Rules and limits around unhealthy foods, the original item "How often do you restrict (or try to restrict) your child's access to fruit juice?" was deleted from the start because fruit juices are viewed as ambiguous in terms of healthiness in France.

<sup>b</sup> For the dimension Guided choices: amount of food eating, the original item "I know better than my child if she or he is hungry or full" (R) was deleted from the start.; The CFAs also indicated that it was better to delete item Amount3.

<sup>c</sup> For the dimension Feeding on a schedule, equal loadings were imposed in order to avoid a non-admissible solution (loadings higher than 1 or lower than -1, and negative variances).
