# Supplementary material
Source: PubMed Central journal article supplement (PMC7825985)
Supplement: mmc2.pdf [file mmc2.pdf]

## Appendix B. Regression analyses

**Appendix B.1.** Simple linear regression models with the change in child level of boredom or the changes in child eating behaviors (when change occurred) as dependent variables and child age, sex and child BMI z-score as independent variables.

| <b>Change in behavior</b>               | <b>Df</b> | <b>Estimate</b> | <b>Std. Error</b> | <b><i>t</i></b> | <b><i>p</i></b>  |
|-----------------------------------------|-----------|-----------------|-------------------|-----------------|------------------|
| <b>Child boredom</b>                    |           |                 |                   |                 |                  |
| Age                                     | 274       | 0.02            | 0.02              | 0.75            | 0.45             |
| Sex [ <i>ref boys</i> ]                 | 274       | -0.08           | 0.09              | -0.84           | 0.40             |
| z-BMI                                   | 269       | -0.05           | 0.03              | -1.90           | 0.06             |
| <b>Emotional overeating</b>             |           |                 |                   |                 |                  |
| Age                                     | 150       | -0.04           | 0.02              | -1.73           | 0.09             |
| Sex [ <i>ref boys</i> ]                 | 150       | -0.05           | 0.10              | -0.55           | 0.58             |
| z-BMI                                   | 147       | -0.04           | 0.03              | -1.42           | 0.16             |
| <b>Food responsiveness</b>              |           |                 |                   |                 |                  |
| Age                                     | 224       | -0.01           | 0.02              | -0.50           | 0.62             |
| Sex [ <i>ref boys</i> ]                 | 224       | -0.01           | 0.08              | -0.13           | 0.90             |
| z-BMI                                   | 220       | -0.07           | 0.02              | <b>-2.96</b>    | <b>&lt;0.001</b> |
| <b>Food enjoyment</b>                   |           |                 |                   |                 |                  |
| Age                                     | 135       | -0.04           | 0.03              | -1.53           | 0.13             |
| Sex [ <i>ref boys</i> ]                 | 135       | 0.07            | 0.14              | 0.49            | 0.62             |
| z-BMI                                   | 132       | -0.04           | 0.04              | -0.92           | 0.36             |
| <b>Appetite</b>                         |           |                 |                   |                 |                  |
| Age                                     | 164       | -0.03           | 0.03              | -0.97           | 0.33             |
| Sex [ <i>ref boys</i> ]                 | 164       | 0.13            | 0.12              | 1.07            | 0.29             |
| z-BMI                                   | 160       | 0.00            | 0.03              | -0.09           | 0.93             |
| <b>Food pickiness</b>                   |           |                 |                   |                 |                  |
| Age                                     | 96        | -0.04           | 0.04              | -1.12           | 0.26             |
| Sex [ <i>ref boys</i> ]                 | 96        | 0.18            | 0.17              | 1.01            | 0.31             |
| z-BMI                                   | 94        | -0.03           | 0.04              | -0.64           | 0.52             |
| <b>Mid-afternoon snack frequency</b>    |           |                 |                   |                 |                  |
| Age                                     | 116       | 0.01            | 0.06              | 0.18            | 0.85             |
| Sex [ <i>ref boys</i> ]                 | 116       | -0.07           | 0.27              | -0.25           | 0.80             |
| z-BMI                                   | 114       | 0.04            | 0.09              | 0.42            | 0.67             |
| <b>Snack frequency in between meals</b> |           |                 |                   |                 |                  |
| Age                                     | 198       | 0.03            | 0.04              | 0.72            | 0.47             |
| Sex [ <i>ref boys</i> ]                 | 198       | 0.19            | 0.18              | 1.03            | 0.31             |
| z-BMI                                   | 194       | -0.09           | 0.06              | -1.55           | 0.12             |

**Appendix B.2.** Simple linear regression models with the changes in parental feeding practices (when change occurred) as dependent variables and parental demographics as independent variables.

| <b>Change in practice</b>                           | <b>Df</b> | <b>Estimate</b> | <b>Std. Error</b> | <b><i>t</i></b> | <b><i>p</i></b> |
|-----------------------------------------------------|-----------|-----------------|-------------------|-----------------|-----------------|
| <b>Soothing with food</b>                           |           |                 |                   |                 |                 |
| Level of education                                  | 89        | -0.05           | 0.03              | -1.69           | 0.10            |
| No work <sup>a</sup> [ <i>ref working outside</i> ] | 88        | 0.08            | 0.09              | 0.87            | 0.39            |
| Working from home [ <i>ref working outside</i> ]    | 88        | -0.07           | 0.10              | -0.67           | 0.51            |
| Parent sex [ <i>ref men</i> ]                       | 89        | -0.02           | 0.08              | -0.22           | 0.82            |
| Single parent [ <i>ref couple</i> ]                 | 89        | -0.15           | 0.15              | -0.99           | 0.32            |
| Parent BMI                                          | 89        | 0.01            | 0.01              | 1.40            | 0.17            |
| <b>Guided choices – when</b>                        |           |                 |                   |                 |                 |
| Level of education                                  | 128       | -0.04           | 0.03              | -1.08           | 0.28            |
| No work <sup>a</sup> [ <i>ref working outside</i> ] | 127       | -0.16           | 0.12              | -1.34           | 0.18            |
| Working from home [ <i>ref working outside</i> ]    | 127       | -0.14           | 0.13              | -1.15           | 0.25            |
| Parent sex [ <i>ref men</i> ]                       | 128       | 0.22            | 0.09              | <b>2.32</b>     | <b>0.02</b>     |
| Single parent [ <i>ref couple</i> ]                 | 128       | -0.19           | 0.13              | -1.46           | 0.15            |
| Parent BMI                                          | 128       | 0.14            | 0.01              | 0.75            | 0.45            |
| <b>Guided choices – what</b>                        |           |                 |                   |                 |                 |
| Level of education                                  | 107       | -0.08           | 0.04              | -1.88           | 0.06            |
| No work <sup>a</sup> [ <i>ref working outside</i> ] | 106       | -0.15           | 0.15              | -0.98           | 0.33            |
| Working from home [ <i>ref working outside</i> ]    | 106       | -0.18           | 0.15              | -1.20           | 0.23            |
| Parent sex [ <i>ref men</i> ]                       | 107       | -0.08           | 0.11              | -0.69           | 0.49            |
| Single parent [ <i>ref couple</i> ]                 | 107       | -0.23           | 0.16              | -1.44           | 0.15            |
| Parent BMI                                          | 107       | 0.01            | 0.01              | 1.00            | 0.32            |
| <b>Guided choices – amount</b>                      |           |                 |                   |                 |                 |
| Level of education                                  | 68        | 0.03            | 0.06              | 0.44            | 0.66            |
| No work <sup>a</sup> [ <i>ref working outside</i> ] | 67        | 0.01            | 0.20              | 0.06            | 0.95            |
| Working from home [ <i>ref working outside</i> ]    | 67        | -0.08           | 0.22              | -0.38           | 0.70            |
| Parent sex [ <i>ref men</i> ]                       | 68        | -0.17           | 0.16              | -1.05           | 0.30            |
| Single parent [ <i>ref couple</i> ]                 | 68        | -0.33           | 0.25              | -1.34           | 0.18            |
| Parent BMI                                          | 68        | 0.00            | 0.01              | 0.33            | 0.74            |
| <b>Meal atmosphere</b>                              |           |                 |                   |                 |                 |
| Level of education                                  | 115       | 0.10            | 0.05              | 1.79            | 0.08            |
| No work <sup>a</sup> [ <i>ref working outside</i> ] | 114       | 0.17            | 0.19              | 0.90            | 0.37            |
| Working from home [ <i>ref working outside</i> ]    | 114       | 0.29            | 0.20              | 1.41            | 0.16            |
| Parent sex [ <i>ref men</i> ]                       | 115       | 0.15            | 0.15              | 1.00            | 0.32            |
| Single parent [ <i>ref couple</i> ]                 | 115       | 0.04            | 0.21              | 0.2             | 0.85            |
| Parent BMI                                          | 115       | -0.03           | 0.01              | <b>-2.47</b>    | <b>0.01</b>     |
| <b>Rules and limits around unhealthy foods</b>      |           |                 |                   |                 |                 |
| Level of education                                  | 133       | -0.08           | 0.03              | <b>-2.45</b>    | <b>0.02</b>     |
| No work <sup>a</sup> [ <i>ref working outside</i> ] | 132       | 0.00            | 0.11              | -0.01           | 0.99            |
| Working from home [ <i>ref working outside</i> ]    | 132       | -0.07           | 0.12              | -0.53           | 0.60            |
| Parent sex [ <i>ref men</i> ]                       | 133       | 0.07            | 0.09              | 0.81            | 0.42            |
| Single parent [ <i>ref couple</i> ]                 | 133       | -0.02           | 0.14              | -0.14           | 0.89            |
| Parent BMI                                          | 133       | 0.00            | 0.01              | 0.22            | 0.83            |

| <b>Meal setting</b>                                 |     |       |      |             |             |
|-----------------------------------------------------|-----|-------|------|-------------|-------------|
| Level of education                                  | 65  | 0.02  | 0.04 | 0.42        | 0.67        |
| No work <sup>a</sup> [ <i>ref working outside</i> ] | 64  | -0.02 | 0.16 | -0.11       | 0.92        |
| Working from home [ <i>ref working outside</i> ]    | 64  | 0.12  | 0.16 | 0.74        | 0.46        |
| Parent sex [ <i>ref men</i> ]                       | 65  | -0.06 | 0.11 | -0.56       | 0.58        |
| Single parent [ <i>ref couple</i> ]                 | 65  | 0.04  | 0.15 | 0.25        | 0.80        |
| Parent BMI                                          | 65  | -0.00 | 0.01 | -0.71       | 0.48        |
| <b>Feeding on a schedule</b>                        |     |       |      |             |             |
| Level of education                                  | 154 | 0.11  | 0.04 | <b>2.65</b> | <b>0.01</b> |
| No work <sup>a</sup> [ <i>ref working outside</i> ] | 153 | -0.04 | 0.13 | -0.35       | 0.73        |
| Working from home [ <i>ref working outside</i> ]    | 153 | 0.10  | 0.14 | 0.70        | 0.48        |
| Parent sex [ <i>ref men</i> ]                       | 154 | -0.06 | 0.11 | -0.53       | 0.60        |
| Single parent [ <i>ref couple</i> ]                 | 154 | -0.18 | 0.15 | -1.19       | 0.24        |
| Parent BMI                                          | 154 | -0.01 | 0.01 | -1.51       | 0.13        |

<sup>a</sup> No work refers to those parents who were at home without work; e.g., those who are technically unemployed due to the lockdown, parents on parental leave, students, etc.

**Appendix B.3.** Simple linear regression models with changes in motivations for buying foods for the child as dependent variables and parental demographics as independent variables

| <b>Change in motivation</b>                         | <b>Df</b> | <b>Estimate</b> | <b>Std. Error</b> | <b>t</b>     | <b>p</b>                |
|-----------------------------------------------------|-----------|-----------------|-------------------|--------------|-------------------------|
| <b>Low price</b>                                    |           |                 |                   |              |                         |
| Level of education                                  | 210       | -0.01           | 0.05              | -0.23        | 0.82                    |
| No work <sup>a</sup> [ <i>ref working outside</i> ] | 209       | -0.12           | 0.18              | -0.70        | 0.49                    |
| Working from home [ <i>ref working outside</i> ]    | 209       | -0.07           | 0.18              | -0.40        | 0.69                    |
| Parent sex [ <i>ref men</i> ]                       | 210       | -0.11           | 0.15              | -0.75        | 0.45                    |
| Financial status <sup>b</sup>                       | 209       | 0.08            | 0.07              | 1.19         | 0.23                    |
| Single parent [ <i>ref couple</i> ]                 | 210       | 0.30            | 0.21              | 1.39         | 0.16                    |
| Parent BMI                                          | 210       | 0.02            | 0.01              | 1.88         | 0.06                    |
| <b>Convenience</b>                                  |           |                 |                   |              |                         |
| Level of education                                  | 286       | -0.11           | 0.05              | <b>-2.18</b> | <b>0.03<sup>c</sup></b> |
| No work <sup>a</sup> [ <i>ref working outside</i> ] | 285       | -0.41           | 0.17              | <b>-2.41</b> | <b>0.02*</b>            |
| Working from home [ <i>ref working outside</i> ]    | 285       | -0.54           | 0.17              | <b>-3.18</b> | <b>&lt;0.001*</b>       |
| Parent sex [ <i>ref men</i> ]                       | 286       | 0.07            | 0.14              | 0.51         | 0.61                    |
| Financial status <sup>b</sup>                       | 285       | -0.09           | 0.06              | -1.36        | 0.18                    |
| Single parent [ <i>ref couple</i> ]                 | 286       | -0.07           | 0.19              | -0.35        | 0.72                    |
| Parent BMI                                          | 286       | 0.03            | 0.01              | <b>2.05</b>  | <b>0.04<sup>c</sup></b> |
| <b>Conservation</b>                                 |           |                 |                   |              |                         |
| Level of education                                  | 182       | 0.08            | 0.07              | 1.18         | 0.24                    |
| No work <sup>a</sup> [ <i>ref working outside</i> ] | 181       | -0.31           | 0.23              | -1.34        | 0.18                    |
| Working from home [ <i>ref working outside</i> ]    | 181       | -0.25           | 0.24              | -1.03        | 0.30                    |
| Parent sex [ <i>ref men</i> ]                       | 182       | -0.02           | 0.19              | -0.09        | 0.93                    |
| Financial status <sup>b</sup>                       | 181       | 0.03            | 0.09              | 0.37         | 0.71                    |
| Single parent [ <i>ref couple</i> ]                 | 182       | 0.46            | 0.28              | 1.65         | 0.10                    |
| Parent BMI                                          | 182       | -0.04           | 0.02              | <b>-2.22</b> | <b>0.03</b>             |
| <b>Pleasure</b>                                     |           |                 |                   |              |                         |
| Level of education                                  | 282       | 0.06            | 0.03              | 1.84         | 0.07                    |
| No work <sup>a</sup> [ <i>ref working outside</i> ] | 281       | -0.14           | 0.10              | -1.38        | 0.17                    |
| Working from home [ <i>ref working outside</i> ]    | 281       | -0.06           | 0.11              | -0.56        | 0.58                    |
| Parent sex [ <i>ref men</i> ]                       | 282       | 0.09            | 0.08              | 1.02         | 0.31                    |
| Financial status <sup>b</sup>                       | 281       | 0.00            | 0.04              | 0.03         | 0.98                    |
| Single parent [ <i>ref couple</i> ]                 | 282       | -0.05           | 0.13              | -0.40        | 0.69                    |
| Parent BMI                                          | 282       | -0.01           | 0.01              | -0.65        | 0.51                    |
| <b>Health control</b>                               |           |                 |                   |              |                         |
| Level of education                                  | 235       | 0.13            | 0.04              | <b>3.25</b>  | <b>&lt;0.001</b>        |
| No work <sup>a</sup> [ <i>ref working outside</i> ] | 234       | 0.04            | 0.14              | 0.26         | 0.79                    |
| Working from home [ <i>ref working outside</i> ]    | 234       | 0.11            | 0.14              | 0.79         | 0.43                    |
| Parent sex [ <i>ref men</i> ]                       | 235       | 0.07            | 0.11              | 0.64         | 0.52                    |
| Financial status <sup>b</sup>                       | 234       | 0.07            | 0.05              | 1.36         | 0.18                    |
| Single parent [ <i>ref couple</i> ]                 | 235       | -0.01           | 0.16              | -0.07        | 0.94                    |
| Parent BMI                                          | 235       | -0.01           | 0.01              | -0.79        | 0.43                    |
| <b>Sustainability</b>                               |           |                 |                   |              |                         |
| Level of education                                  | 323       | 0.17            | 0.03              | <b>5.04</b>  | <b>&lt;0.001*</b>       |
| No work <sup>a</sup> [ <i>ref working outside</i> ] | 322       | -0.08           | 0.12              | -0.69        | 0.49                    |

|                                                     |     |       |      |              |                              |
|-----------------------------------------------------|-----|-------|------|--------------|------------------------------|
| Working from home [ <i>ref working outside</i> ]    | 322 | 0.10  | 0.12 | 0.87         | 0.38                         |
| Parent sex [ <i>ref men</i> ]                       | 323 | -0.08 | 0.09 | -0.87        | 0.39                         |
| Financial status <sup>b</sup>                       | 321 | 0.14  | 0.04 | <b>3.19</b>  | <b>&lt;0.001<sup>c</sup></b> |
| Single parent [ <i>ref couple</i> ]                 | 323 | -0.37 | 0.14 | <b>-2.57</b> | <b>0.01*</b>                 |
| Parent BMI                                          | 323 | -0.01 | 0.01 | -1.76        | 0.08                         |
| <b>Preference</b>                                   |     |       |      |              |                              |
| Level of education                                  | 214 | 0.02  | 0.03 | 0.67         | 0.51                         |
| No work <sup>a</sup> [ <i>ref working outside</i> ] | 213 | -0.13 | 0.11 | -1.18        | 0.24                         |
| Working from home [ <i>ref working outside</i> ]    | 213 | -0.16 | 0.12 | -1.34        | 0.18                         |
| Parent sex [ <i>ref men</i> ]                       | 214 | -0.07 | 0.09 | -0.74        | 0.46                         |
| Financial status <sup>b</sup>                       | 213 | 0.04  | 0.04 | 0.84         | 0.40                         |
| Single parent [ <i>ref couple</i> ]                 | 214 | 0.29  | 0.16 | 1.79         | 0.07                         |
| Parent BMI                                          | 214 | -0.01 | 0.01 | -1.65        | 0.10                         |
| <b>Weight control</b>                               |     |       |      |              |                              |
| Level of education                                  | 186 | 0.12  | 0.05 | <b>2.37</b>  | <b>0.02<sup>c</sup></b>      |
| No work <sup>a</sup> [ <i>ref working outside</i> ] | 185 | -0.03 | 0.18 | -0.18        | 0.86                         |
| Working from home [ <i>ref working outside</i> ]    | 185 | 0.03  | 0.19 | 0.18         | 0.86                         |
| Parent sex [ <i>ref men</i> ]                       | 186 | -0.14 | 0.15 | -0.94        | 0.35                         |
| Financial status <sup>b</sup>                       | 185 | 0.13  | 0.06 | <b>2.08</b>  | <b>0.04<sup>c</sup></b>      |
| Single parent [ <i>ref couple</i> ]                 | 186 | 0.04  | 0.22 | 0.20         | 0.84                         |
| Parent BMI                                          | 186 | -0.02 | 0.01 | -1.73        | 0.08                         |
| <b>Comforting</b>                                   |     |       |      |              |                              |
| Level of education                                  | 187 | 0.12  | 0.05 | <b>2.28</b>  | <b>0.02</b>                  |
| No work <sup>a</sup> [ <i>ref working outside</i> ] | 186 | -0.05 | 0.17 | -0.29        | 0.77                         |
| Working from home [ <i>ref working outside</i> ]    | 186 | 0.02  | 0.17 | 0.09         | 0.93                         |
| Parent sex [ <i>ref men</i> ]                       | 187 | 0.11  | 0.14 | 0.76         | 0.45                         |
| Financial status <sup>b</sup>                       | 186 | 0.03  | 0.07 | 0.46         | 0.64                         |
| Single parent [ <i>ref couple</i> ]                 | 187 | 0.25  | 0.21 | 1.20         | 0.23                         |
| Parent BMI                                          | 187 | -0.02 | 0.01 | -1.37        | 0.17                         |
| <b>Natural</b>                                      |     |       |      |              |                              |
| Level of education                                  | 242 | 0.06  | 0.05 | 1.26         | 0.21                         |
| No work <sup>a</sup> [ <i>ref working outside</i> ] | 241 | 0.22  | 0.16 | 1.34         | 0.18                         |
| Working from home [ <i>ref working outside</i> ]    | 241 | 0.09  | 0.17 | 0.56         | 0.58                         |
| Parent sex [ <i>ref men</i> ]                       | 242 | -0.22 | 0.13 | -1.68        | 0.09                         |
| Financial status <sup>b</sup>                       | 240 | 0.07  | 0.06 | 1.14         | 0.26                         |
| Single parent [ <i>ref couple</i> ]                 | 242 | -0.22 | 0.19 | -1.13        | 0.26                         |
| Parent BMI                                          | 242 | 0.01  | 0.01 | 0.67         | 0.51                         |

<sup>a</sup> No work refers to those parents who were at home without work; e.g., those who are technically unemployed due to the lockdown, parents on parental leave, students, etc.

<sup>b</sup> Perceived financial status ranges from less to more comfortable.

<sup>c</sup> No longer significant after adjustment for the other significant predictors (multiple regression).

\* Remains significant after adjustment for the other significant predictors (multiple regression).
